# Supplementary material
Source: PubMed Central journal article supplement (PMC3613989)
Supplement: NIHMS178731-supplement-Supplementary_data.pdf [file NIHMS178731-supplement-Supplementary_data.pdf]

|               |                                                           |
|---------------|-----------------------------------------------------------|
| Consensus     | GGGCTGGGGCAGGGGCGGGACAGGGGTAGGGTGGCGCGGTGGCTGGGCGCAAAGGTC |
| prP2Y2 Caco-2 | GGGCTGGGGCAGGGGCGGGACAGGGGTAGGGTGGCGCGGTGGCTGGGCGCAAAGGTC |
| prP2Y2 HCAEC  | -----GCAGGGGCGGGACAGGGGTAGGGTGGCGCGGTGGCTGGGCGCAAAGGTC    |
| Consensus     | CCGCAGTGGGCCACGCAGGCACCGGGCTGACCTGGCAAACCTTTGGCGTCTC-GAAA |
| prP2Y2 Caco-2 | CCGCAGTGGGCCACGCAGGCACCGGGCTGACCTGGCAAACCTTTGGCGTCTCTGAAA |
| prP2Y2 HCAEC  | CCGCAGTGGGCCACGCAGGCACCGGGCTGACCTGGCAAACCTTTGGCGTCTCAGAAA |
| Consensus     | ACCTCTGTAACCCAGCTCCCTTCTAGCGTGAGGGAGCCGGGAGGCGCTCTTCTGGCC |
| prP2Y2 Caco-2 | ACCTCTGTAACCCAGCTCCCTTCTAGCGTGAGGGAGCCGGGAGGCGCTCTTCTGGCC |
| prP2Y2 HCAEC  | ACCTCTGTAACCCAGCTCCCTTCTAGCGTGAGGGAGCCGGGAGGCGCTCTTCTGGCC |
| Consensus     | CGGCAGTGAGAGCGTCGCCGCCGACCCTCCCGTTGCAGCACCGGTACAGACACGC*  |
| prP2Y2 Caco-2 | CGGCAGTGAGAGCGTCGCCGCCGACCCTCCCGTTGCAGCACCGGTACAGACACGCT  |
| prP2Y2 HCAEC  | CGGCAGTGAGAGCGTCGCCGCCGACCCTCCCGTTGCAGCACCGGTACAGACACGCG  |
| Consensus     | GACCCCGGGCCTTGTCGCTGGGCGGGCTCCCGGAGCGGGTGGCGGGTGTCTACCC   |
| prP2Y2 Caco-2 | GACCCCGGGCCTTGTCGCTGGGCGGGCTCCCGGAGCGGGTGGCGGGTGTCTACCC   |
| prP2Y2 HCAEC  | GACCCCGGGCCTTGTCGCTGGGCGGGCTCCCGGAGCGGGTGGCGGGTGTCTACCC   |
| Consensus     | GGGCGGGTTGAGGGCGGTGCCAGGGTCAGTCAAAGTCCGCCCCGCCCTGCCTGG*   |
| prP2Y2 Caco-2 | GGGCGGGTTGAGGGCGGTGCCAGGGTCAGTCAAAGTCCGCCCCGCCCTGCCTGG    |
| prP2Y2 HCAEC  | GGGCGGGTTGAGGGCGGTGCCAGGGTCAGTCAAAGTCCGCCCCGCCCTGCCTGG    |
| Consensus     | CCCGGCTTCGGGGTTGGGGAACAGCGCAGGGAGGTGGGTAGCCGGGCTCCAGGCAC  |
| prP2Y2 Caco-2 | CCCGGCTTCGGGGTTGGGGAACAGCGCAGGGAGGTGGGTAGCCGGGCTCCAGGCAC  |
| prP2Y2 HCAEC  | CCCGGCTTCGGGGTTGGGGAACAGCGCAGGGAGGTGGGTAGCCGGGCTCCAGGCAC  |
| Consensus     | GTGGGTCTCTGCGGCTGCGGCGGGACCCGGGCACTGGCACCCGGAGCGGGCGGAC   |
| prP2Y2 Caco-2 | GTGGGTCTCTGCGGCTGCGGCGGGACCCGGGCACTGGCACCCGGAGCGGGCGGAC   |
| prP2Y2 HCAEC  | GTGGGTCTCTGCGGCTGCGGCGGGACCCGGGCACTGGCACCCGGAGCGGGCGGAC   |
| Consensus     | GGCACCTGAGAGGAGAAGCGCAGCGCAGTGCGGAGAGGTGGGGTGGGGCGTCTGGA  |
| prP2Y2 Caco-2 | GGCACCTGAGAGGAGAAGCGCAGCGCAGTGCGGAGAGGTGGGGTGGGGCGTCTGGA  |
| prP2Y2 HCAEC  | GGCACCTGAGAGGAGAAGCGCAGCGCAGTGCGGAGAGGTGGGGTGGGGCGTCTGGA  |
| Consensus     | GGGAACAAGGCG +130bp                                       |
| prP2Y2 Caco-2 | GGGAACAAGGCG                                              |
| prP2Y2 HCAEC  | GGGAACAAGGCG                                              |

**SUPPLEMENTAL-FIGURE 2. Schematic representation of the P2Y<sub>2</sub>R core promoter organization.** Alignment of the core promoter sequences cloned from Caco-2 and HCAEC cells shows a homology of 99.2%. Sp1 and NFκB potential binding sites are indicated in red and purple, respectively. The green region represents 130bp of exon 1. Transcription start site found using primer extension assay is indicated in pink while transcription start site found using 5'RLM-RACE is indicated in orange. Mismatched base pairs are indicated by blue stars.

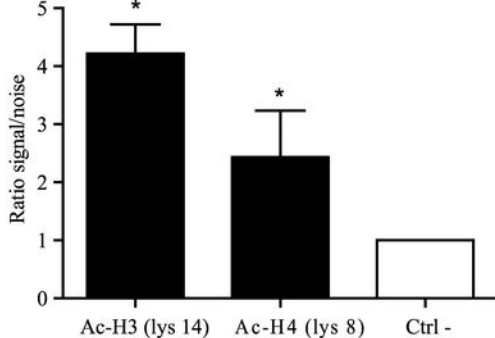

**SUPPLEMENTAL-FIGURE 3. Transcriptional activation of the P2Y<sub>2</sub>R gene by NF- $\kappa$ B p65 is located in a chromosomic region of active transcription.** Chromatin immunoprecipitation assays were performed on Caco-2 cell extracts. Chromatin was immunoprecipitated with a mouse IgG antibody (Ctrl -) or antibody against acetylated histone H3 (lys 14) and H4 (lys 8). Samples were verified by quantitative RT-PCR analysis with oligonucleotides amplifying the -221 bp to -155 bp region of the P2Y<sub>2</sub>R promoter and expressed as fold increase over negative control normalized to input. Representative results from 3 independent experiments are shown. Statistical analysis were performed an unpaired *t* test where \*;  $p < 0.05$  when compared to samples immunoprecipitated with the normal mouse IgG antibody.

**Table 1. Oligonucleotides used for Real-Time PCR of P2Y<sub>2</sub>R**

| Oligonucleotide                            | Sequence (5' → 3')    |
|--------------------------------------------|-----------------------|
| P2Y <sub>2</sub> R Upstream <sup>a</sup>   | CGGTGGACTTAGCTCTGAGG  |
| P2Y <sub>2</sub> R Downstream <sup>a</sup> | GCCTCCAGATGGGTCTATGA  |
| P2Y <sub>2</sub> R Upstream <sup>b</sup>   | ATGTCGCTTCAACGAGGACT  |
| P2Y <sub>2</sub> R Downstream <sup>b</sup> | TGCCAGGTGAAACATGTAGG  |
| COX-2 Upstream <sup>a</sup>                | TGAAACCCACTCCAAACAC   |
| COX-2 Downstream <sup>a</sup>              | AACTGATGCGTGAAGTGCTG  |
| TBP Upstream <sup>a</sup>                  | TGAGGATAAGAGAGCCACGAA |
| TBP Downstream <sup>a</sup>                | GAGCACAAGGCCTTCTAACCT |
| TBP Upstream <sup>b</sup>                  | TATAATCCCAAGCGGTTTGC  |
| TBP Downstream <sup>b</sup>                | CCCACCATGTTCTGGATCTT  |

Oligonucleotide primers targeting: <sup>a</sup> *Homo sapiens*; <sup>b</sup> *Rattus norvegicus*

**Table 2. P2Y<sub>2</sub>R primers for RLM-RACE assays**

| Oligonucleotide                       | Sequence (5' → 3')   |
|---------------------------------------|----------------------|
| hY2R1 (296 bp to 315 bp) <sup>c</sup> | GAGCATCCTGACCTGGAGAG |
| hY2R3 (371 bp to 390 bp) <sup>c</sup> | ATGGCACCTGGGATGGGGAT |
| hY2R4 (675 bp to 694 bp) <sup>c</sup> | CACCAACCTTTACTGCAGCA |

<sup>c</sup> given position relative to GenBank NM\_002564.2

**Table 3. P2Y<sub>2</sub>R promoter cloning**

| Oligonucleotide                           | Sequence (5' → 3')            |
|-------------------------------------------|-------------------------------|
| <i>P2Y<sub>2</sub>/NheI (upstream)</i>    | GCTAGCCAGGAATGCAGTTTCCTCAGCTG |
| <i>P2Y<sub>2</sub>/BglII (downstream)</i> | AGATCTCGCCTTGTTCCCTCCAGA      |

Underlined are the annealing sequences

**Table 4. Oligonucleotides used for the construction of P2Y<sub>2</sub>R promoter deletion mutants**

| Oligonucleotide                                     | Sequence (5' → 3')               |
|-----------------------------------------------------|----------------------------------|
| <i>P2Y<sub>2</sub>Δ-400bp (-359bp to -339bp)</i>    | AAGCTGGCTAGCGGCTGACCTGGCAAACTTT  |
| <i>P2Y<sub>2</sub>Δ-800bp (-794bp to -774bp)</i>    | AAGCTGGCTAGCAGCAGGAAGAAGGCAGACCT |
| <i>P2Y<sub>2</sub>Δ-1200bp (-1172bp tp -1152bp)</i> | AAGCTGGCTAGCCACTATGGGCTGTGTGTCCA |

Underlined are the annealing sequences

**Table 5. Oligonucleotides used for the deletions of the putative NFκB-p65 binding motif**

| Oligonucleotide                                        | Sequence (5' → 3')             |
|--------------------------------------------------------|--------------------------------|
| <i>P2Y<sub>2</sub>ΔNBM1 (-290 to -260)<sup>d</sup></i> | GTGAGGGAGGAATTCCTAGGCTTCTGGCC  |
| <i>P2Y<sub>2</sub>ΔNBM2 (-192 to -162)<sup>d</sup></i> | CTTGTCGCTGTTAATTAAGAATTCGCGGGT |
| <i>P2Y<sub>2</sub>ΔNBM3 (-145 to -115)<sup>d</sup></i> | GGCGGGTTGAATTCACGCGTAGGGTCAGT  |

<sup>d</sup> Sense strands only are shown

**Table 6. ChIP assays**

| Oligonucleotide                                  | Sequence (5' → 3')          |
|--------------------------------------------------|-----------------------------|
| P2Y <sub>2</sub> C Upstream (-221bp to -201bp)   | <i>ACCGGTACAGACACGCTGAC</i> |
| P2Y <sub>2</sub> C Downstream (-123bp to -104bp) | <i>GGCGGACTTTTGACTGACC</i>  |

**Table 7. List of oligonucleotides used for EMSA<sup>a</sup>**

| Oligonucleotide                  | Sequence (5' → 3') <sup>e</sup> |
|----------------------------------|---------------------------------|
| <b>NBM1</b> (-282 bp to -268 bp) | <i>CCGGGAGGCCTCCTT</i>          |
| <b>NBM2</b> (-184 bp to -169 bp) | <i>GGGCGGCGTCCCGGA</i>          |
| <b>NBM3</b> (-138 bp to -124 bp) | <i>GAGGGCGGTGCCAGG</i>          |

<sup>e</sup> Sense strands only are shown. Mutated nucleotides are underlined.
